# Supplementary material for: Insights into myalgic encephalomyelitis/chronic fatigue syndrome phenotypes through comprehensive metabolomics
Source: PubMed Central journal article supplement (PMC6030047; doi:10.1038/s41598-018-28477-9), 2018-07-03
Supplement: 41598_2018_28477_MOESM1_ESM.pdf [file 41598_2018_28477_MOESM1_ESM.pdf]

**Title: Insights into myalgic encephalomyelitis/chronic fatigue syndrome phenotypes through comprehensive metabolomics**

Authors: Dorottya Nagy-Szakal, Dinesh K. Barupal, Bohyun Lee, Xiaoyu Che, Brent L. Williams, Ellie J. R. Kahn, Joy E. Ukaigwe, Lucinda Bateman, Nancy G. Klimas, Anthony L. Komaroff, Susan Levine, Jose G. Montoya, Daniel L. Peterson, Bruce Levin, Mady Hornig, Oliver Fiehn, W. Ian Lipkin

**Supplementary Information**

The Supplementary Information includes Supplementary Figures and Tables.

## Supplementary Materials

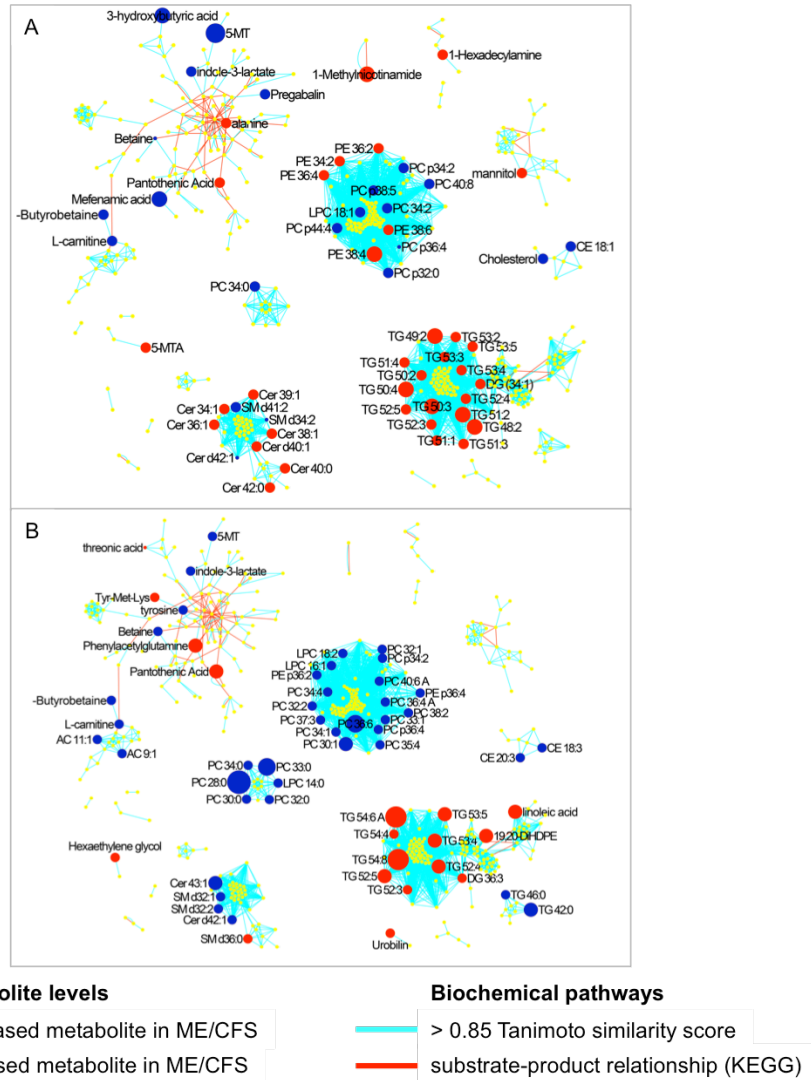

**Figure S1. Metabolites differentiate ME/CFS with IBS (A) and without IBS (B) from controls.** MetaMapp networks of all identified metabolites in the ME/CFS subgroups were constructed by Tanimoto chemical similarity and KEGG reaction pairs. Each node represents a metabolite. In each node, red indicates up-regulation and blue indicates down-regulation. Node size reflects the magnitude of the effect. Only the compounds that pass a p-value cutoff of 0.05 are labeled. Red lines show the biochemical reactions and blue lines demonstrate chemical similarity scores above 0.85 Tanimoto similarity coefficients. The network was created using [www.metamapp.fiehnlab.ucdavis.edu](http://www.metamapp.fiehnlab.ucdavis.edu) (18) and visualized in the Cytoscape using the organic layout algorithm.

*5-MT*: 5-methoxytryptamine, *5-MTA*: 5-methylthioadenosine, *19,20-DiHDPE*: *C22H34O4*, *AC*: acylcarnitine, *Cer/CE*: ceramide, *DG*: diacylglycerol, *FA*: fatty acid, *LPC*: lysophosphatidylcholine, *PC*: phosphatidylcholine, *PE*: phosphatidylethanolamine, *SM*: sphingomyelin, *TG*: triglyceride, *Tyr Met Lys*: tyrosine methionine lysine.

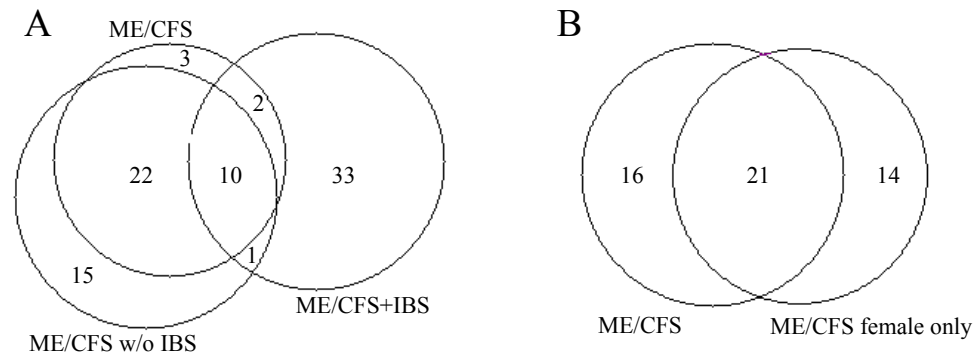

**Figure S2. Overlap in ME/CFS metabolic profile subtypes. (A) ME/CFS with IBS has a distinct metabolic profile.** A proportional Venn diagram of the number of compounds with p-value < 0.05 in Mann-Whitney U test and logistic regression model (**Table S2 and S3**) shows overlap between all ME/CFS cases and the ME/CFS without IBS subgroup but little overlap with the ME/CFS with IBS subgroup. **(B) The metabolic profiles in women with ME/CFS were similar to those seen in all ME/CFS cases.** The unique and shared metabolites are shown in **Table S4**.

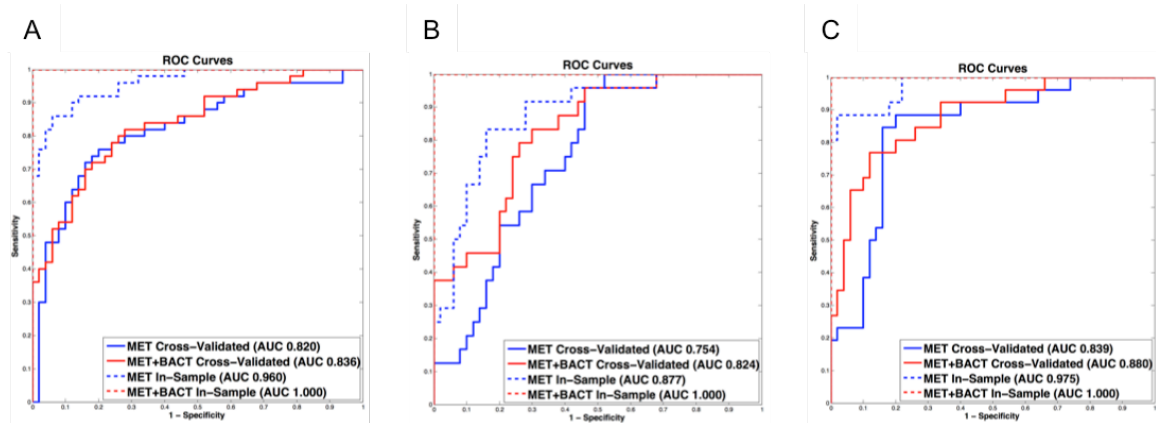

**Figure S3. The diagnostic performance (AUROC curves) of ME/CFS and subgroup metabolomics and metagenomics.** The Mann-Whitney U test and adjusted univariate logistic regression method were used to screen potential metabolic predictors that differentiate the ME/CFS subgroups from controls, based on all ME/CFS (A) and ME/CFS patients with IBS co-morbidity (B) and without IBS (C). Random forests were used to select top ranked predictors after excluding 5-methoxytryptamine. The top 10 random forests-ranked metabolites were used as predictors in the predictive multivariate logistic regression models (**Tables S2** in ME/CFS, **S3A** in ME/CFS+IBS and **S3B** ME/CFS without IBS). In-sample and cross-validated receiver operating characteristic (ROC) curves were plotted and area under the curve (AUC) was measured to assess the goodness-of-fit and predictive performance of the models. The accuracy of the outcome prediction improved when metagenomic information was added to the models (14). The selected bacterial species are the following: ME/CFS vs. control: *Coprococcus (C.) catus*, *Pseudoflavonifractor (P.) capillosus*, *Dorea (D.) formicigenerans*, *Faecalibacterium (F.) prausnitzii*, *Clostridium (C.) asparigiforme*, *Sutterella (S.) wadsworthensis*, *Alistipes (A.) putredinis* and *Anaerotruncus (A.) colihominis*; ME/CFS+IBS vs. control: *F. cf.*, *F. prausnitzii*, *Bacteroides (B.) vulgatus*, *A. putredinis*, *C. catus*, *Anaerostipes (A.) caccae*, *D. formicigenerans*, *A. colihominis* and *C. asparigiforme*; ME/CFS without IBS vs. control: *B. caccae*, *P. capillosus*, *Parabacteroides (P.) distasonis*, *B. fragilis*, *Prevotella (P.) buccalis*, *B. xylanisolvens* and *D. formicigenerans*.

## Supplementary Tables

**Table S1. Exogenous environmental compounds that were excluded.** Forty-seven exposomes and vitamins were separately analyzed by Mann-Whitney U test and logistic regression. Green highlighting indicates higher levels in the ME/CFS than the control group. Red indicates lower levels in the ME/CFS group than in the control group. Only pantothenic acid showed significant difference between ME/CFS cases and controls (MWU  $p=0.014$ , OR 1.755,  $p=0.011$ ).

**Table S2. Mann-Whitney U test, logistic regression and random forests analyses of metabolites in ME/CFS vs. controls.** The nonparametric Mann-Whitney U test and adjusted univariate logistic regression were applied to screen potential metabolic predictors for ME/CFS. Univariate logistic regression adjusted for all frequency matched variables, BMI and IBS. The metabolites with a p-value below 0.05 in both U test and univariate logistic regression were fitted into random forests (17) to develop a representative set of variables. The top 10 random forests-ranked metabolites (highlighted) were used as predictors in the predictive multivariate logistic regression models. 5-methoxytryptamine was not included in random forests analyses as it is confounded by the use of antidepressants in 50% of cases.

*ME/CFS: myalgic encephalomyelitis/chronic fatigue syndrome, LPC: lysophosphatidylcholine, TG: triglyceride, PC: phosphatidylcholine, SM: sphingomyelin, CE: ceramide, DG: diacylglycerol, PE: phosphatidylethanolamine, Tyr Met Lys: tyrosine methionine lysine.*

**Table S3. Mann-Whitney U test, logistic regression and random forests analyses of metabolites in ME/CFS+IBS (A), ME/CFS without IBS (B) and female ME/CFS (C) vs. controls.** The nonparametric Mann-Whitney U test and adjusted univariate logistic regression were applied to screen potential metabolic predictors for ME/CFS subgroups. Univariate logistic regression adjusted for all frequency matched variables and BMI. The metabolites with a p-value below 0.05 in both U test and univariate logistic regression were fitted into random forests (17) to develop a representative set of variables. The top 10 random forests-ranked metabolites (highlighted) were used as predictors in the predictive multivariate logistic regression models. 5-methoxytryptamine was not included in random forests analyses as it is confounded by the use of antidepressants in 50% of cases.

*ME/CFS: myalgic encephalomyelitis/chronic fatigue syndrome, IBS: irritable bowel syndrome, LPC: lysophosphatidylcholine, TG: triglyceride, PC: phosphatidylcholine, SM: sphingomyelin, CE: ceramide, DG: diacylglycerol, PE: phosphatidylethanolamine, Tyr Met Lys: tyrosine methionine lysine.*

**Table S4. The unique and shared metabolites in ME/CFS subgroups.**

**Table S5. Spearman correlation of selected metabolites, bacteria and symptom severity in ME/CFS cases.**

Arrows represent the direction of metabolites and bacteria seen in ME/CFS and subgroups compared to controls.

*ME/CFS: myalgic encephalomyelitis/chronic fatigue syndrome, IBS: irritable bowel syndrome, SF-36: Short Form 36 Health Survey, MFI: Multidimensional Fatigue Inventory, TG: triglyceride, PC: phosphatidylcholine, \*\* $p < 0.01$  (Spearman correlation, with positive [red] and negative [blue] correlation).*

**Table S6. Clinical symptom assessment in ME/CFS.** The table describes the individual surveys with the specific questions listed. Each instrument was transformed into a 0-100 scale to facilitate combination and comparison, wherein a score of 100 is equivalent to maximum disability or severity and a score of zero is equivalent to no disability or disturbance.

**Table S7. Median and 25-75% quantiles of chemical compounds differ in ME/CFS and subgroups vs. controls.**

Table S1.

| Compound name                                          | Direction in ME/CFS | ME/CFS vs. Control |                     |                             |                     |              |
|--------------------------------------------------------|---------------------|--------------------|---------------------|-----------------------------|---------------------|--------------|
|                                                        |                     | Chemical Pathway   | Metabolic Panel     | Mann-Whitney U-test p-value | Logistic Regression |              |
|                                                        |                     |                    |                     |                             | Odds ratio          | p-value      |
| 1-hexadecylamine                                       | Decreased           | exposome           | biogenic amines     | 0.632                       | 0.837               | 0.446        |
| 2-aminobenzoic acid                                    | Decreased           | exposome           | biogenic amines     | 0.410                       | 0.889               | 0.678        |
| 2-hydroxyquinoline                                     | Decreased           | exposome           | biogenic amines     | 0.076                       | 0.737               | 0.303        |
| 4-aminophenol B                                        | Increased           | exposome           | biogenic amines     | 0.754                       | 1.309               | 0.349        |
| aniline                                                | Decreased           | exposome           | biogenic amines     | 0.770                       | 0.945               | 0.821        |
| benzoic acid                                           | Increased           | exposome           | primary metabolites | 0.712                       | 1.625               | 0.285        |
| caffeine                                               | Decreased           | exposome           | biogenic amines     | 0.354                       | 0.902               | 0.676        |
| citral                                                 | Increased           | exposome           | biogenic amines     | 0.833                       | 1.124               | 0.724        |
| coniferyl alcohol                                      | Increased           | exposome           | biogenic amines     | 0.608                       | 1.109               | 0.727        |
| cotinine                                               | Decreased           | exposome           | biogenic amines     | 0.263                       | 0.948               | 0.860        |
| cyclohexanamine                                        | Increased           | exposome           | biogenic amines     | 0.372                       | 1.728               | 0.167        |
| D panthenol                                            | Increased           | exposome           | biogenic amines     | 0.723                       | 1.164               | 0.423        |
| dehydroascorbic acid                                   | Increased           | exposome           | primary metabolites | 0.372                       | 1.115               | 0.638        |
| diatrizoic acid                                        | Decreased           | exposome           | biogenic amines     | 0.211                       | 0.558               | 0.117        |
| diaveridine                                            | Increased           | exposome           | biogenic amines     | 0.347                       | 1.540               | 0.110        |
| dihydrocoumarin                                        | Decreased           | exposome           | biogenic amines     | 0.579                       | 0.983               | 0.944        |
| dimethyl sulfoxide                                     | Decreased           | exposome           | biogenic amines     | 0.775                       | 0.772               | 0.328        |
| dioctyl phthalate                                      | Decreased           | exposome           | biogenic amines     | 0.915                       | 0.904               | 0.738        |
| dodecanol                                              | Increased           | exposome           | primary metabolites | 0.893                       | 1.184               | 0.531        |
| hexaethylene glycol                                    | Increased           | exposome           | biogenic amines     | 0.091                       | 1.639               | 0.029        |
| hippuric acid                                          | Increased           | exposome           | biogenic amines     | 0.764                       | 1.054               | 0.844        |
| hippuric acid                                          | Decreased           | exposome           | primary metabolites | 0.519                       | 0.915               | 0.716        |
| ibuprofen                                              | Increased           | exposome           | primary metabolites | 0.828                       | 1.334               | 0.072        |
| imazamethabenz methyl                                  | Increased           | exposome           | biogenic amines     | 0.180                       | 1.768               | 0.118        |
| mefenamic acid                                         | Decreased           | exposome           | biogenic amines     | 0.037                       | 0.705               | 0.165        |
| methyl cinnamate                                       | Increased           | exposome           | biogenic amines     | 0.038                       | 2.522               | 0.203        |
| methyljasmonate                                        | Decreased           | exposome           | biogenic amines     | 0.812                       | 0.723               | 0.078        |
| minoxidil                                              | Decreased           | exposome           | biogenic amines     | 0.707                       | 0.761               | 0.404        |
| myosmine                                               | Increased           | exposome           | biogenic amines     | 0.738                       | 1.097               | 0.734        |
| N-3-aminomethyl-benzyl-acetamide                       | Decreased           | exposome           | biogenic amines     | 0.593                       | 0.861               | 0.592        |
| N-cyclohexylformamide                                  | Increased           | exposome           | biogenic amines     | 0.361                       | 1.554               | 0.155        |
| N-Tris-hydroxymethyl-methyl-4-aminobutanesulfonic acid | Increased           | exposome           | biogenic amines     | 0.149                       | 1.792               | 0.178        |
| naproxen                                               | Decreased           | exposome           | primary metabolites | 0.368                       | 0.790               | 0.463        |
| nicotinamide                                           | Increased           | vitamin            | biogenic amines     | 0.039                       | 1.372               | 0.088        |
| pantothenic acid                                       | Increased           | vitamin            | biogenic amines     | <b>0.014</b>                | <b>1.755</b>        | <b>0.011</b> |
| phenol                                                 | Decreased           | exposome           | primary metabolites | 0.692                       | 0.989               | 0.968        |
| pinene oxide                                           | Increased           | exposome           | biogenic amines     | 0.476                       | 1.047               | 0.857        |
| piperine                                               | Decreased           | exposome           | biogenic amines     | 0.687                       | 0.919               | 0.707        |
| pregabalin                                             | Decreased           | exposome           | biogenic amines     | 0.062                       | 0.796               | 0.348        |
| quinic acid                                            | Decreased           | exposome           | primary metabolites | 0.189                       | 0.811               | 0.377        |
| salicylic acid                                         | Decreased           | exposome           | primary metabolites | 0.329                       | 0.421               | 0.108        |
| tetradecylamine                                        | Decreased           | exposome           | biogenic amines     | 0.764                       | 0.910               | 0.686        |
| tetraethylene glycol monomethyl ether                  | Increased           | exposome           | biogenic amines     | 0.281                       | 1.606               | 0.166        |
| tetrapentylammonium cation                             | Increased           | exposome           | biogenic amines     | 0.326                       | 1.185               | 0.507        |
| theobromine                                            | Decreased           | exposome           | biogenic amines     | 0.637                       | 0.906               | 0.643        |
| tocopherol alpha                                       | Decreased           | vitamin            | primary metabolites | 0.372                       | 0.956               | 0.841        |
| triethyl citrate                                       | Increased           | exposome           | biogenic amines     | 0.749                       | 1.038               | 0.891        |

Table S2.

| ME/CFS vs. Control                  |                     |                        |                     |                 |                     |         |               |            |
|-------------------------------------|---------------------|------------------------|---------------------|-----------------|---------------------|---------|---------------|------------|
| Compound name                       | Direction in ME/CFS | Chemical Pathway       | Metabolic Panel     | Mann-Whitney U- | Logistic Regression |         | Random Forest |            |
|                                     |                     |                        |                     | test p-value    | Odds ratio          | p-value | Importance    | RF ranking |
| LPC 18:2                            | Decreased           | PC                     | complex lipids      | 0.004           | 0.512               | 0.013   | 0.629         | 1          |
| Betaine                             | Decreased           | carnitine-choline      | biogenic amines     | 0.006           | 0.551               | 0.021   | 0.537         | 2          |
| TG 53:5                             | Increased           | TG                     | complex lipids      | 0.001           | 1.699               | 0.028   | 0.422         | 3          |
| $\alpha$ N-phenylacetyl-L-glutamine | Increased           | amino acid metabolism  | biogenic amines     | 0.004           | 2.457               | 0.015   | 0.376         | 4          |
| PC 30:0                             | Decreased           | PC                     | complex lipids      | 0.017           | 0.330               | 0.001   | 0.352         | 5          |
| SM d32:1                            | Decreased           | SM                     | complex lipids      | 0.017           | 0.513               | 0.009   | 0.346         | 6          |
| PC 33:0                             | Decreased           | PC                     | complex lipids      | 0.002           | 0.397               | 0.000   | 0.304         | 7          |
| Urobilin                            | Increased           | energy                 | biogenic amines     | 0.010           | 2.086               | 0.023   | 0.283         | 8          |
| $\epsilon$ Caprolactam              | Increased           | amino acid             | biogenic amines     | 0.033           | 1.925               | 0.041   | 0.276         | 9          |
| TG 54:8                             | Increased           | TG                     | complex lipids      | 0.003           | 1.751               | 0.018   | 0.257         | 10         |
| $\gamma$ Butyrobetaine              | Decreased           | carnitine-choline      | biogenic amines     | 0.001           | 0.599               | 0.027   | 0.248         | 11         |
| PC p34:2 or PC o34:3                | Decreased           | PC                     | complex lipids      | 0.027           | 0.549               | 0.033   | 0.230         | 12         |
| TG 53:4                             | Increased           | TG                     | complex lipids      | 0.002           | 1.896               | 0.025   | 0.222         | 13         |
| L-carnitine                         | Decreased           | carnitine-choline      | biogenic amines     | 0.005           | 0.378               | 0.003   | 0.190         | 14         |
| TG 52:5                             | Increased           | TG                     | complex lipids      | 0.002           | 1.994               | 0.034   | 0.173         | 15         |
| PC 28:0                             | Decreased           | PC                     | complex lipids      | 0.006           | 0.373               | 0.001   | 0.166         | 16         |
| PC 34:0                             | Decreased           | PC                     | complex lipids      | 0.008           | 0.513               | 0.015   | 0.165         | 17         |
| TG 54:6 A                           | Increased           | TG                     | complex lipids      | 0.015           | 2.222               | 0.007   | 0.157         | 18         |
| PC 36:4 A                           | Decreased           | PC                     | complex lipids      | 0.050           | 0.569               | 0.037   | 0.156         | 19         |
| Indole-3-lactate                    | Decreased           | neurotransmitter       | primary metabolites | 0.007           | 0.549               | 0.023   | 0.151         | 20         |
| Tyr Met Lys                         | Increased           | amino acid             | biogenic amines     | 0.025           | 2.801               | 0.012   | 0.119         | 21         |
| TG 52:4                             | Increased           | TG                     | complex lipids      | 0.002           | 2.438               | 0.007   | 0.118         | 22         |
| TG 52:3                             | Increased           | TG                     | complex lipids      | 0.005           | 2.048               | 0.023   | 0.088         | 23         |
| PC 34:4                             | Decreased           | PC                     | complex lipids      | 0.032           | 0.511               | 0.007   | 0.081         | 24         |
| LPC 16:1                            | Decreased           | PC                     | complex lipids      | 0.024           | 0.389               | 0.004   | 0.078         | 25         |
| Acylcarnitine C9:1                  | Decreased           | carnitine              | biogenic amines     | 0.022           | 0.502               | 0.025   | 0.065         | 26         |
| PC 32:2                             | Decreased           | PC                     | complex lipids      | 0.012           | 0.478               | 0.004   | 0.058         | 27         |
| PC 32:0                             | Decreased           | PC                     | complex lipids      | 0.006           | 0.415               | 0.010   | 0.051         | 28         |
| PC p36:4 or PC o36:5                | Decreased           | PC                     | complex lipids      | 0.024           | 0.537               | 0.022   | 0.038         | 29         |
| CE 18:3                             | Decreased           | cholesterol            | complex lipids      | 0.024           | 0.598               | 0.018   | 0.025         | 30         |
| PC 35:4                             | Decreased           | PC                     | complex lipids      | 0.017           | 0.521               | 0.011   | 0.012         | 31         |
| PC 34:1                             | Decreased           | PC                     | complex lipids      | 0.012           | 0.427               | 0.010   | 0.001         | 32         |
| TG 54:5 A                           | Increased           | TG                     | complex lipids      | 0.021           | 1.741               | 0.040   | -0.025        | 33         |
| DG 36:3                             | Increased           | mono-, diacylglyceride | complex lipids      | 0.024           | 1.954               | 0.014   | -0.032        | 34         |
| Acylcarnitine C11:1                 | Decreased           | carnitines             | biogenic amines     | 0.025           | 0.599               | 0.027   | -0.033        | 35         |
| PE p36:4 or PE o36:5                | Decreased           | PE                     | complex lipids      | 0.033           | 0.442               | 0.013   | -0.045        | 36         |
| 5-methoxytryptamine                 | Decreased           | neurotransmitter       | primary metabolites | 0.005           | 0.643               | 0.036   |               |            |



Table S3.

| A. ME/CFS+IBS vs. Control |                         |                         |                     |                |                     |         |               |            |
|---------------------------|-------------------------|-------------------------|---------------------|----------------|---------------------|---------|---------------|------------|
| Compound name             | Direction in ME/CFS+IBS | Chemical Pathway        | Metabolic Panel     | Mann-Whitney   | Logistic Regression |         | Random Forest |            |
|                           |                         |                         |                     | U-test p-value | Odds ratio          | p-value | Importance    | RF ranking |
| LPC 18:2                  | Decreased               | PC                      | complex lipids      | 0.000          | 0.305               | 0.004   | 1.475         | 1          |
| Ceramide d36:1            | Increased               | ceramide                | complex lipids      | 0.002          | 2.825               | 0.015   | 1.028         | 2          |
| γ Butyrobetaine           | Decreased               | carnitine-choline       | biogenic amines     | 0.000          | 0.470               | 0.003   | 0.827         | 3          |
| LPC 18:1                  | Decreased               | PC                      | complex lipids      | 0.001          | 0.396               | 0.011   | 0.751         | 4          |
| 5-Methylthioadenosine     | Increased               | one-carbon / nicotinate | biogenic amines     | 0.001          | 3.715               | 0.005   | 0.706         | 5          |
| TG 49:2                   | Increased               | TG                      | complex lipids      | 0.006          | 1.844               | 0.043   | 0.618         | 6          |
| Ceramide d40:0            | Increased               | ceramide                | complex lipids      | 0.002          | 2.340               | 0.024   | 0.499         | 7          |
| TG 51:3                   | Increased               | TG                      | complex lipids      | 0.001          | 2.459               | 0.020   | 0.496         | 8          |
| Betaine                   | Decreased               | carnitine-choline       | biogenic amines     | 0.016          | 0.555               | 0.028   | 0.381         | 9          |
| Ceramide d42:0            | Increased               | ceramide                | complex lipids      | 0.016          | 2.014               | 0.028   | 0.365         | 10         |
| LPC p16:0 or LPC o16:1    | Decreased               | PC                      | complex lipids      | 0.001          | 0.483               | 0.026   | 0.357         | 11         |
| Ceramide d34:1            | Increased               | ceramide                | complex lipids      | 0.005          | 2.257               | 0.025   | 0.288         | 12         |
| Indole-3-lactate          | Decreased               | neurotransmitter        | primary metabolites | 0.020          | 0.484               | 0.032   | 0.286         | 13         |
| TG 50:3                   | Increased               | TG                      | complex lipids      | 0.003          | 2.214               | 0.017   | 0.253         | 14         |
| TG 53:4                   | Increased               | TG                      | complex lipids      | 0.003          | 2.807               | 0.007   | 0.235         | 15         |
| PE 38:6                   | Increased               | PE                      | complex lipids      | 0.009          | 6.836               | 0.012   | 0.146         | 16         |
| TG 53:3                   | Increased               | TG                      | complex lipids      | 0.014          | 3.026               | 0.013   | 0.125         | 17         |
| TG 51:4                   | Increased               | TG                      | complex lipids      | 0.017          | 2.020               | 0.029   | 0.114         | 18         |
| TG 52:5                   | Increased               | TG                      | complex lipids      | 0.013          | 2.718               | 0.019   | 0.107         | 19         |
| PC 36:4 A                 | Decreased               | PC                      | complex lipids      | 0.021          | 0.512               | 0.036   | 0.099         | 20         |
| TG 53:5                   | Increased               | TG                      | complex lipids      | 0.008          | 2.159               | 0.016   | 0.098         | 21         |
| TG 51:2                   | Increased               | TG                      | complex lipids      | 0.006          | 2.140               | 0.020   | 0.083         | 22         |
| TG 50:4                   | Increased               | TG                      | complex lipids      | 0.004          | 2.614               | 0.009   | 0.075         | 23         |
| DG 34:1                   | Increased               | mono-, diacylglyceride  | complex lipids      | 0.042          | 2.427               | 0.040   | 0.073         | 24         |
| Mannitol                  | Increased               | sugar alcohol           | primary metabolites | 0.012          | 1.998               | 0.043   | 0.073         | 25         |
| PC 34:2                   | Decreased               | PC                      | complex lipids      | 0.009          | 0.429               | 0.009   | 0.039         | 26         |
| Ceramide d38:1            | Increased               | ceramide                | complex lipids      | 0.004          | 2.961               | 0.005   | 0.035         | 27         |
| PC p32:0 or PC o32:1      | Decreased               | PC                      | complex lipids      | 0.011          | 0.519               | 0.024   | 0.034         | 28         |
| PC p34:2 or PC o34:3      | Decreased               | PC                      | complex lipids      | 0.028          | 0.467               | 0.014   | 0.030         | 29         |
| TG 51:1                   | Increased               | TG                      | complex lipids      | 0.042          | 1.792               | 0.038   | 0.023         | 30         |
| TG 53:2                   | Increased               | TG                      | complex lipids      | 0.025          | 2.281               | 0.022   | 0.020         | 31         |
| CE 18:1                   | Decreased               | cholesterol             | complex lipids      | 0.013          | 0.487               | 0.024   | 0.020         | 32         |
| PE 34:2                   | Increased               | PE                      | complex lipids      | 0.013          | 2.184               | 0.028   | 0.019         | 33         |
| TG 52:4                   | Increased               | TG                      | complex lipids      | 0.038          | 2.184               | 0.027   | 0.017         | 34         |
| L-alanine                 | Increased               | amino acid              | biogenic amines     | 0.019          | 1.883               | 0.048   | 0.005         | 35         |
| L-carnitine               | Decreased               | carnitine-choline       | biogenic amines     | 0.035          | 0.554               | 0.041   | 0.004         | 36         |
| PE 38:4 B                 | Increased               | PE                      | complex lipids      | 0.011          | 1.993               | 0.037   | 0.004         | 37         |
| TG 50:2                   | Increased               | TG                      | complex lipids      | 0.031          | 1.811               | 0.046   | 0.002         | 38         |
| PC 40:8                   | Decreased               | PC                      | complex lipids      | 0.038          | 0.576               | 0.050   | -0.001        | 39         |
| PE 36:4                   | Increased               | PE                      | complex lipids      | 0.028          | 1.752               | 0.049   | -0.003        | 40         |
| Cholesterol               | Increased               | cholesterol             | primary metabolites | 0.044          | 0.557               | 0.034   | -0.005        | 41         |
| Ceramide d40:1            | Increased               | ceramide                | complex lipids      | 0.048          | 2.490               | 0.018   | -0.021        | 42         |
| PE 36:2                   | Increased               | PE                      | complex lipids      | 0.042          | 2.015               | 0.035   | -0.033        | 43         |
| TG 48:2                   | Increased               | TG                      | complex lipids      | 0.037          | 1.878               | 0.039   | -0.080        | 44         |
| 5-methoxytryptamine       | Decreased               | neurotransmitter        | primary metabolites | 0.005          | 0.450               | 0.002   |               |            |

**B. ME/CFS w/o IBS vs. Control**

| Compound name        | Direction in ME/CFS w/o IBS | Chemical Pathway       | Metabolic Panel     | Mann-Whitney   | Logistic Regression |         | Random Forest |            |
|----------------------|-----------------------------|------------------------|---------------------|----------------|---------------------|---------|---------------|------------|
|                      |                             |                        |                     | U-test p-value | Odds ratio          | p-value | Importance    | RF ranking |
| PC 33:0              | Decreased                   | PC                     | complex lipids      | 0.000          | 0.386               | 0.000   | 1.309         | 1          |
| PC 38:2              | Decreased                   | PC                     | complex lipids      | 0.000          | 0.487               | 0.007   | 0.817         | 2          |
| PC 30:0              | Decreased                   | PC                     | complex lipids      | 0.000          | 0.323               | 0.001   | 0.599         | 3          |
| tyrosine             | Decreased                   | amino acid             | primary metabolites | 0.008          | 0.333               | 0.001   | 0.590         | 4          |
| PC 36:6              | Decreased                   | PC                     | complex lipids      | 0.028          | 0.545               | 0.015   | 0.427         | 5          |
| TG 54:6 A            | Increased                   | TG                     | complex lipids      | 0.001          | 2.267               | 0.009   | 0.392         | 6          |
| TG 53:5              | Increased                   | TG                     | complex lipids      | 0.004          | 1.736               | 0.030   | 0.351         | 7          |
| TG 54:8              | Increased                   | TG                     | complex lipids      | 0.003          | 1.674               | 0.030   | 0.335         | 8          |
| Tyr Met Lys          | Increased                   | amino acid             | biogenic amines     | 0.011          | 2.893               | 0.015   | 0.312         | 9          |
| PC 32:2              | Decreased                   | PC                     | complex lipids      | 0.001          | 0.483               | 0.006   | 0.312         | 10         |
| PC 32:1              | Decreased                   | PC                     | complex lipids      | 0.002          | 0.342               | 0.004   | 0.266         | 11         |
| LPC 18:2             | Decreased                   | PC                     | complex lipids      | 0.008          | 0.530               | 0.017   | 0.239         | 12         |
| LPC 16:1             | Decreased                   | PC                     | complex lipids      | 0.003          | 0.418               | 0.007   | 0.233         | 13         |
| PC 32:1              | Decreased                   | PC                     | complex lipids      | 0.012          | 0.518               | 0.009   | 0.224         | 14         |
| SM d32:1             | Decreased                   | SM                     | complex lipids      | 0.005          | 0.500               | 0.009   | 0.216         | 15         |
| PC 28:0              | Decreased                   | PC                     | complex lipids      | 0.001          | 0.378               | 0.001   | 0.210         | 16         |
| PC 34:4              | Decreased                   | PC                     | complex lipids      | 0.003          | 0.504               | 0.008   | 0.205         | 17         |
| Linoleic acid        | Increased                   | fatty acid             | primary metabolites | 0.035          | 1.781               | 0.027   | 0.174         | 18         |
| SM d32:2             | Decreased                   | SM                     | complex lipids      | 0.015          | 0.561               | 0.021   | 0.161         | 19         |
| PC 32:0              | Decreased                   | PC                     | complex lipids      | 0.004          | 0.387               | 0.010   | 0.160         | 20         |
| Acylcarnitine C9:1   | Decreased                   | carnitine              | biogenic amines     | 0.009          | 0.478               | 0.024   | 0.152         | 21         |
| TG 52:3              | Increased                   | TG                     | complex lipids      | 0.004          | 2.102               | 0.023   | 0.145         | 22         |
| PC p34:2 or PC o34:3 | Decreased                   | PC                     | complex lipids      | 0.043          | 0.542               | 0.035   | 0.132         | 23         |
| Indole-3-lactate     | Decreased                   | neurotransmitter       | primary metabolites | 0.035          | 0.545               | 0.024   | 0.129         | 24         |
| PC 34:0              | Decreased                   | PC                     | complex lipids      | 0.012          | 0.488               | 0.014   | 0.124         | 25         |
| TG 54:4              | Increased                   | TG                     | complex lipids      | 0.009          | 1.986               | 0.027   | 0.117         | 26         |
| TG 52:4              | Increased                   | TG                     | complex lipids      | 0.003          | 2.422               | 0.009   | 0.115         | 27         |
| TG 52:5              | Increased                   | TG                     | complex lipids      | 0.011          | 1.930               | 0.045   | 0.107         | 28         |
| PC p36:4 or PC o36:5 | Decreased                   | PC                     | complex lipids      | 0.045          | 0.512               | 0.018   | 0.103         | 29         |
| DG 36:3              | Increased                   | mono-, diacylglyceride | complex lipids      | 0.010          | 1.960               | 0.017   | 0.097         | 30         |
| TG 14:0:14:0:14:0    | Decreased                   | TG                     | complex lipids      | 0.031          | 0.418               | 0.032   | 0.095         | 31         |
| PC 34:4              | Decreased                   | PC                     | complex lipids      | 0.008          | 0.471               | 0.005   | 0.094         | 32         |
| Urobilin             | Increased                   | energy                 | biogenic amines     | 0.016          | 2.408               | 0.017   | 0.091         | 33         |
| L-carnitine          | Decreased                   | carnitine-choline      | biogenic amines     | 0.016          | 0.352               | 0.002   | 0.091         | 34         |
| PC 32:2              | Decreased                   | PC                     | complex lipids      | 0.015          | 0.559               | 0.014   | 0.075         | 35         |
| PC 32:0              | Decreased                   | PC                     | complex lipids      | 0.025          | 0.594               | 0.038   | 0.074         | 36         |
| PC 33:1              | Decreased                   | PC                     | complex lipids      | 0.012          | 0.544               | 0.024   | 0.065         | 37         |
| Betaine              | Decreased                   | carnitine-choline      | biogenic amines     | 0.040          | 0.548               | 0.025   | 0.064         | 38         |
| PC 40:6 A            | Decreased                   | PC                     | complex lipids      | 0.030          | 0.525               | 0.022   | 0.062         | 39         |
| PC 37:3              | Decreased                   | PC                     | complex lipids      | 0.007          | 0.560               | 0.020   | 0.058         | 40         |
| Ceramide d43:1       | Decreased                   | ceramide               | complex lipids      | 0.007          | 0.469               | 0.008   | 0.050         | 41         |
| Ceramide d42:1       | Decreased                   | ceramide               | complex lipids      | 0.035          | 0.600               | 0.050   | 0.042         | 42         |
| PE p36:4 or PE o36:5 | Decreased                   | PE                     | complex lipids      | 0.033          | 0.411               | 0.011   | 0.026         | 43         |
| PC 36:4 A            | Decreased                   | PC                     | complex lipids      | 0.031          | 0.567               | 0.039   | 0.025         | 44         |
| PC 30:1              | Decreased                   | PC                     | complex lipids      | 0.015          | 0.543               | 0.032   | 0.025         | 45         |
| PC 35:4              | Decreased                   | PC                     | complex lipids      | 0.021          | 0.504               | 0.010   | 0.023         | 46         |
| LPC 14:0             | Decreased                   | PC                     | complex lipids      | 0.010          | 0.482               | 0.009   | 0.021         | 47         |
| Acylcarnitine C11:1  | Decreased                   | carnitine              | biogenic amines     | 0.016          | 0.613               | 0.036   | 0.016         | 48         |
| PC 34:1              | Decreased                   | PC                     | complex lipids      | 0.007          | 0.435               | 0.013   | 0.012         | 49         |
| TG 53:4              | Increased                   | TG                     | complex lipids      | 0.036          | 1.891               | 0.030   | 0.008         | 50         |
| CE 18:3              | Decreased                   | cholesterol            | complex lipids      | 0.020          | 0.574               | 0.017   | 0.005         | 51         |
| PC 38:2              | Decreased                   | PC                     | complex lipids      | 0.025          | 0.600               | 0.049   | -0.004        | 52         |

**C. ME/CFS vs. Control -female only**

| Compound name          | Direction in ME/CFS | Chemical Pathway  | Metabolic Panel     | Mann-Whitney U-<br>test p-value | Logistic Regression |         | Random Forest |            |
|------------------------|---------------------|-------------------|---------------------|---------------------------------|---------------------|---------|---------------|------------|
|                        |                     |                   |                     |                                 | Odds ratio          | p-value | Importance    | RF ranking |
| LPC 18:2               | Decreased           | PC                | complex lipids      | 0.0002                          | 0.3681              | 0.0107  | 1.2410        | 1          |
| TG 53:5                | Increased           | TG                | complex lipids      | 0.0001                          | 2.9681              | 0.0018  | 0.9402        | 2          |
| TG 51:3                | Increased           | TG                | complex lipids      | 0.0009                          | 2.0010              | 0.0486  | 0.9080        | 3          |
| indole-3-lactate       | Decreased           | neurotransmitter  | primary metabolites | 0.0010                          | 0.3698              | 0.0051  | 0.7401        | 4          |
| LPC 18:2               | Decreased           | PC                | complex lipids      | 0.0020                          | 0.3632              | 0.0058  | 0.7082        | 5          |
| TG 52:3                | Increased           | TG                | complex lipids      | 0.0002                          | 3.4103              | 0.0044  | 0.5521        | 6          |
| PC 30:0                | Decreased           | PC                | complex lipids      | 0.0236                          | 0.2204              | 0.0013  | 0.5184        | 7          |
| γ-butyrobetaine        | Decreased           | carnitine-choline | biogenic amines     | 0.0004                          | 0.5708              | 0.0222  | 0.5139        | 8          |
| PC 28:0                | Decreased           | PC                | complex lipids      | 0.0036                          | 0.2859              | 0.0005  | 0.4149        | 9          |
| PC 33:0                | Decreased           | PC                | complex lipids      | 0.0048                          | 0.3603              | 0.0003  | 0.3583        | 10         |
| LPC 20:2               | Decreased           | PC                | complex lipids      | 0.0068                          | 0.5392              | 0.0490  | 0.3559        | 11         |
| TG 52:5                | Increased           | TG                | complex lipids      | 0.0008                          | 2.6205              | 0.0253  | 0.3218        | 12         |
| LPC 18:1               | Decreased           | PC                | complex lipids      | 0.0017                          | 0.4218              | 0.0266  | 0.3019        | 13         |
| TG 52:4                | Increased           | TG                | complex lipids      | 0.0003                          | 4.4958              | 0.0017  | 0.2485        | 14         |
| LPE 18:2               | Decreased           | PE                | complex lipids      | 0.0129                          | 0.4394              | 0.0151  | 0.2147        | 15         |
| L-carnitine            | Decreased           | carnitine-choline | biogenic amines     | 0.0052                          | 0.4020              | 0.0119  | 0.2011        | 16         |
| TG 53:3                | Increased           | TG                | complex lipids      | 0.0016                          | 2.6514              | 0.0167  | 0.1841        | 17         |
| CE 18:3                | Decreased           | cholesterol       | complex lipids      | 0.0155                          | 0.5808              | 0.0233  | 0.1791        | 18         |
| SM d32:1               | Decreased           | SM                | complex lipids      | 0.0493                          | 0.5227              | 0.0352  | 0.1507        | 19         |
| PC 32:0                | Decreased           | PC                | complex lipids      | 0.0021                          | 0.2406              | 0.0037  | 0.1302        | 20         |
| PC 34:0                | Decreased           | PC                | complex lipids      | 0.0054                          | 0.4848              | 0.0155  | 0.1150        | 21         |
| TG 51:4                | Increased           | TG                | complex lipids      | 0.0016                          | 2.4861              | 0.0079  | 0.1133        | 22         |
| PC 40:8                | Decreased           | PC                | complex lipids      | 0.0076                          | 0.4818              | 0.0475  | 0.1101        | 23         |
| TG 53:4                | Increased           | TG                | complex lipids      | 0.0006                          | 2.8004              | 0.0064  | 0.1094        | 24         |
| TG 54:5 A              | Increased           | TG                | complex lipids      | 0.0062                          | 3.9854              | 0.0028  | 0.1092        | 25         |
| leucine                | Decreased           | amino acid        | biogenic amines     | 0.0123                          | 0.4691              | 0.0403  | 0.1064        | 26         |
| PC p-36:4 or PC o-36:5 | Decreased           | PC                | complex lipids      | 0.0300                          | 0.4340              | 0.0187  | 0.1013        | 27         |
| DG 36:3                | Increased           | DG                | complex lipids      | 0.0054                          | 2.8206              | 0.0037  | 0.0926        | 28         |
| TG 54:6 A              | Increased           | TG                | complex lipids      | 0.0194                          | 3.9758              | 0.0043  | 0.0791        | 29         |
| LPC 16:1               | Decreased           | PC                | complex lipids      | 0.0180                          | 0.2910              | 0.0037  | 0.0678        | 30         |
| PC p-34:2 or PC o-34:3 | Decreased           | PC                | complex lipids      | 0.0194                          | 0.4172              | 0.0118  | 0.0674        | 31         |
| PC 35:4                | Decreased           | PC                | complex lipids      | 0.0329                          | 0.5079              | 0.0209  | 0.0564        | 32         |
| PC 34:1                | Decreased           | PC                | complex lipids      | 0.0113                          | 0.1712              | 0.0037  | 0.0551        | 33         |
| PC p-34:2 or PC o-34:3 | Decreased           | PC                | complex lipids      | 0.0129                          | 0.5135              | 0.0317  | 0.0367        | 34         |
| LPC 16:0               | Decreased           | PC                | complex lipids      | 0.0209                          | 0.4578              | 0.0278  | 0.0116        | 35         |
| Acylcarnitine C9:1     | Decreased           | carnitine         | biogenic amines     | 0.0286                          | 0.3774              | 0.0211  | 0.0053        | 36         |
| LPC 18:1               | Decreased           | PC                | complex lipids      | 0.0293                          | 0.4576              | 0.0281  | 0.0029        | 37         |
| PC p-36:4 or PC o-36:5 | Decreased           | PC                | complex lipids      | 0.0280                          | 0.4865              | 0.0233  | -0.0059       | 38         |
| PE p-36:4 or PE o-36:5 | Decreased           | PE                | complex lipids      | 0.0236                          | 0.3779              | 0.0125  | -0.0094       | 39         |

**Table S4.**

| (A) ME/CFS and IBS co-morbidity   |                                                                                                                                                                                                                                                                                                          |                                                    |                                                                                                                                                                                                                                                                                                          |
|-----------------------------------|----------------------------------------------------------------------------------------------------------------------------------------------------------------------------------------------------------------------------------------------------------------------------------------------------------|----------------------------------------------------|----------------------------------------------------------------------------------------------------------------------------------------------------------------------------------------------------------------------------------------------------------------------------------------------------------|
| Unique metabolites                |                                                                                                                                                                                                                                                                                                          | Shared metabolites                                 |                                                                                                                                                                                                                                                                                                          |
| all ME/CFS<br>3                   | α N-phenylacetyl-L-glutamine<br>TG 54:5 A<br>ε Caprolactam                                                                                                                                                                                                                                               | in all group<br>10                                 | Betaine<br>PC 36:4 A<br>TG 52:5<br>LPC 18:2<br>Indole-3-lactate<br>PC p34:2 or PC o34:3<br>L-carnitine<br>TG 52:4<br>TG 53:5<br>TG 53:4                                                                                                                                                                  |
| ME/CFS+IBS all ME/CFS<br>2        | γ Butyrobetaine<br>5-methoxytryptamine                                                                                                                                                                                                                                                                   |                                                    |                                                                                                                                                                                                                                                                                                          |
| ME/CFS w/o IBS all ME/CFS<br>22   | CE 18:3<br>PC 30:0<br>PC 34:4<br>LPC 16:1<br>SM d32:1<br>Acylcarnitine C9:1<br>DG 36:3<br>TG 54:8<br>PC 32:2<br>PC 35:4<br>Urobilin<br>Tyr Met Lys<br>PC p36:4 or PC o36:5<br>TG 54:6 A<br>PE p36:4 or PE o36:5<br>PC 33:0<br>PC 32:0<br>PC 28:0<br>PC 34:1<br>PC 34:0<br>TG 52:3<br>Acylcarnitine C11:1 |                                                    |                                                                                                                                                                                                                                                                                                          |
|                                   |                                                                                                                                                                                                                                                                                                          | Shared between all ME/CFS and ME/CFS+IBS<br>2      | γ Butyrobetaine<br>5-methoxytryptamine                                                                                                                                                                                                                                                                   |
|                                   |                                                                                                                                                                                                                                                                                                          | Shared between all ME/CFS and ME/CFS w/o IBS<br>22 | CE 18:3<br>PC 30:0<br>PC 34:4<br>LPC 16:1<br>SM d32:1<br>Acylcarnitine C9:1<br>DG 36:3<br>TG 54:8<br>PC 32:2<br>PC 35:4<br>Urobilin<br>Tyr Met Lys<br>PC p36:4 or PC o36:5<br>TG 54:6 A<br>PE p36:4 or PE o36:5<br>PC 33:0<br>PC 32:0<br>PC 28:0<br>PC 34:1<br>PC 34:0<br>TG 52:3<br>Acylcarnitine C11:1 |
| (B) ME/CFS and ME/CFS female only |                                                                                                                                                                                                                                                                                                          |                                                    |                                                                                                                                                                                                                                                                                                          |
| Unique metabolites                |                                                                                                                                                                                                                                                                                                          | Shared metabolites                                 |                                                                                                                                                                                                                                                                                                          |
| all ME/CFS<br>16                  | 5-methoxytryptamine<br>Acylcarnitine C11:1<br>Betaine<br>α N-phenylacetyl-L-glutamine<br>γ Butyrobetaine<br>Indole-3-lactate<br>ε Caprolactam<br>PC 32:2<br>PC 34:4<br>PC 36:4 A<br>PC p34:2 or PC o34:3<br>PC p36:4 or PC o36:5<br>PE p36:4 or PE o36:5<br>TG 54:8<br>Tyr Met Lys<br>Urobilin           | Shared between ME/CFS female only all ME/CFS<br>21 | Acylcarnitine C9:1<br>CE 18:3<br>DG 36:3<br>L-carnitine<br>LPC 16:1<br>LPC 18:2<br>PC 28:0<br>PC 30:0<br>PC 32:0<br>PC 33:0<br>PC 34:0<br>PC 34:1<br>PC 35:4<br>SM d32:1<br>TG 52:3<br>TG 52:4<br>TG 52:5<br>TG 53:4<br>TG 53:5<br>TG 54:5 A<br>TG 54:6 A                                                |
| ME/CFS female only<br>14          | LPE 18:2<br>γ Butyrobetaine<br>indole-3-lactate<br>leucine<br>LPC 16:0<br>LPC 18:1<br>LPC 20:2<br>PC 40:8<br>PC p-34:2 or PC o-34:3<br>PC p-36:4 or PC o-36:5<br>PE p-36:4 or PE o-36:5<br>TG 51:3<br>TG 51:4<br>TG 53:3                                                                                 |                                                    |                                                                                                                                                                                                                                                                                                          |

**Table S5.**

| ME/CFS cases (n=50)                    |   | Betaine  | PC 30:0 |
|----------------------------------------|---|----------|---------|
|                                        |   | ↓        | ↓       |
| [Bacteroidetes] Alistipes putredinis   | ↓ |          | 0.426** |
| [Firmicutes] Anaerotruncus colihominis | ↑ | -0.414** |         |

| ME/CFS+IBS cases (n=24)          |   | γ Butyrobetaine | 5-Methylthio-adenosine | Ceramide d42:0 |
|----------------------------------|---|-----------------|------------------------|----------------|
|                                  |   | ↓               | ↑                      | ↑              |
| [Firmicutes] Faecalibacterium cf | ↓ | -0.558**        |                        |                |
| SF-36 General health             |   |                 | 0.557**                |                |
| MFI Physical fatigue             |   |                 |                        | 0.516**        |

| ME/CFS without IBS cases (n=26)            |   | Tyrosine | TG 54:6 A | TG 54:8  |
|--------------------------------------------|---|----------|-----------|----------|
|                                            |   | ↓        | ↑         | ↑        |
| [Bacteroidetes] Bacteroides caccae         | ↓ |          |           | -0.530** |
| [Bacteroidetes] Parabacteroides distasonis | ↓ | 0.498**  |           |          |
| [Firmicutes] Dorea formicigenerans         | ↓ |          | -0.515**  | -0.574** |

**Table S6.**

| <b>Questionnaire</b>                | <b>Assessment</b>                                                  | <b>Questions used</b>        | <b>Reference</b>                                   |                     |
|-------------------------------------|--------------------------------------------------------------------|------------------------------|----------------------------------------------------|---------------------|
| Cognitive function                  | DePaul Symptom Questionnaire (DSQ) to assess cognitive function    | DSQ 24 25 26 27 28 31 32     | <i>Jason et al. Am J Biochem Biotechnol (2010)</i> |                     |
|                                     | Modified Cognitive Disturbance                                     | DSQ 4 24 25 26 27 28 31 32   |                                                    |                     |
| Sleeping                            | DePaul Symptom Questionnaire (DSQ) to assess sleep disturbances    | DSQ 7 8 9 10 11 12           | <i>Byssse et al. Psychiat Res (1989)</i>           |                     |
|                                     | Pittsburgh Sleep Quality Index (PSQI) to assess sleep disturbances | PSQI 1 2 3 4 5 6 7 8 9 10    |                                                    |                     |
|                                     | PHYSICAL FUNCTION                                                  | SF-36 3 4 5 6 7 8 9 10 11 12 | <i>Ware et al. Med Care (1992)</i>                 |                     |
|                                     | PHYSICAL LIMITATION                                                | SF-36 13 14 15 16            |                                                    |                     |
|                                     | ENERGY SUBSCALE                                                    | SF-36 23 27 29 31            |                                                    |                     |
| Short Form 36 Health Survey (SF-36) | EMOTIONAL LIMITATION                                               | SF-36 17 18 19               | <i>Smets et al. J Psychosom Res (1995)</i>         |                     |
|                                     | EMOTIONAL WELLBEING                                                | SF-36 24 25 26 28 30         |                                                    |                     |
|                                     | SOCIAL FUNCTION                                                    | SF-36 20 32                  |                                                    |                     |
|                                     | PAIN SUBSCALE                                                      | SF-36 21 22                  |                                                    |                     |
|                                     | GENERAL SUBSCALE/HEALTH                                            | SF-36 1 33 34 35 36          |                                                    |                     |
|                                     | HEALTH CHANGE                                                      | SF-36 2                      |                                                    |                     |
|                                     | GENERAL FATIGUE                                                    | MFI (20) 1 5 12 16           |                                                    |                     |
|                                     | PHYSICAL FATIGUE                                                   | MFI (20) 2 8 14 20           |                                                    |                     |
|                                     | Multidimensional Fatigue Inventory (MFI)                           | REDUCED ACTIVITY             |                                                    | MFI (20) 3 6 10 17  |
|                                     |                                                                    | MENTAL FATIGUE               |                                                    | MFI (20) 7 11 13 19 |
| REDUCED MOTIVATION                  |                                                                    | MFI (20) 4 9 15 18           |                                                    |                     |

## Specific questions

### DSQ

1. Fatigue/extreme tiredness: Did you have this symptom BEFORE CFS?  
Over the PAST 6 MONTHS, how OFTEN have you had this symptom?: Fatigue/extreme tiredness  
Over the PAST 6 MONTHS, how MUCH has this symptom bothered you?: Fatigue/extreme tiredness
2. Dead, heavy feeling after starting to exercise: Did you have this symptom BEFORE CFS?  
Over the PAST 6 MONTHS, how OFTEN have you had this symptom?: Dead, heavy feeling after starting to exercise  
Over the PAST 6 MONTHS, how MUCH has this symptom bothered you?: Dead, heavy feeling after starting to exercise
3. Next day soreness or fatigue after non-strenuous, everyday activities: Did you have this symptom BEFORE CFS?  
Over the PAST 6 MONTHS, how OFTEN have you had this symptom?: Next day soreness or fatigue after non-strenuous, everyday activities  
Over the PAST 6 MONTHS, how MUCH has this symptom bothered you?: Next day soreness or fatigue after non-strenuous, everyday activities
4. Mentally tired after the slightest effort: Did you have this symptom BEFORE CFS?  
Over the PAST 6 MONTHS, how OFTEN have you had this symptom?: Mentally tired after the slightest effort  
Over the PAST 6 MONTHS, how MUCH has this symptom bothered you?: Mentally tired after the slightest effort
5. Minimum exercise makes you physically tired: Did you have this symptom BEFORE CFS?  
Over the PAST 6 MONTHS, how OFTEN have you had this symptom?: Minimum exercise makes you physically tired  
Over the PAST 6 MONTHS, how MUCH has this symptom bothered you?: Minimum exercise makes you physically tired
6. Physically drained or sick after mild activity: Did you have this symptom BEFORE CFS?  
Over the PAST 6 MONTHS, how OFTEN have you had this symptom?: Physically drained or sick after mild activity  
Over the PAST 6 MONTHS, how MUCH has this symptom bothered you?: Physically drained or sick after mild activity
7. Feeling unrefreshed after you wake up in the morning: Did you have this symptom BEFORE CFS?  
Over the PAST 6 MONTHS, how OFTEN have you had this symptom?: Feeling unrefreshed after you wake up in the morning  
Over the PAST 6 MONTHS, how MUCH has this symptom bothered you?: Feeling unrefreshed after you wake up in the morning
8. Need to nap daily: Did you have this symptom BEFORE CFS?  
Over the PAST 6 MONTHS, how OFTEN have you had this symptom?: Need to nap daily  
Over the PAST 6 MONTHS, how MUCH has this symptom bothered you?: Need to nap daily
9. Problems falling asleep: Did you have this symptom BEFORE CFS?  
Over the PAST 6 MONTHS, how OFTEN have you had this symptom?: Problems falling asleep  
Over the PAST 6 MONTHS, how MUCH has this symptom bothered you?: Problems falling asleep
10. Problems staying asleep: Did you have this symptom BEFORE CFS?  
Over the PAST 6 MONTHS, how OFTEN have you had this symptom?: Problems staying asleep  
Over the PAST 6 MONTHS, how MUCH has this symptom bothered you?: Problems staying asleep
11. Waking up early in the morning (e.g. 3am): Did you have this symptom BEFORE CFS?  
Over the PAST 6 MONTHS, how OFTEN have you had this symptom?: Waking up early in the morning (e.g. 3am)  
Over the PAST 6 MONTHS, how MUCH has this symptom bothered you?: Waking up early in the morning (e.g. 3am)
12. Sleep all day and stay awake all night: Did you have this symptom BEFORE CFS?  
Over the PAST 6 MONTHS, how OFTEN have you had this symptom?: Sleep all day and stay awake all night  
Over the PAST 6 MONTHS, how MUCH has this symptom bothered you?: Sleep all day and stay awake all night
13. Pain or aching in your muscles: Did you have this symptom BEFORE CFS?  
Over the PAST 6 MONTHS, how OFTEN have you had this symptom?: Pain or aching in your muscles  
Over the PAST 6 MONTHS, how MUCH has this symptom bothered you?: Pain or aching in your muscles
14. Pain/stiffness/tenderness in more than one joint without swelling or redness: Did you have this symptom BEFORE CFS?  
Over the PAST 6 MONTHS, how OFTEN have you had this symptom?: Pain/stiffness/tenderness in more than one joint without swelling or redness  
Over the PAST 6 MONTHS, how MUCH has this symptom bothered you?: Pain/stiffness/tenderness in more than one joint without swelling or redness
15. Eye pain: Did you have this symptom BEFORE CFS?  
Over the PAST 6 MONTHS, how OFTEN have you had this symptom?: Eye pain  
Over the PAST 6 MONTHS, how MUCH has this symptom bothered you?: Eye pain
16. Chest pain: Did you have this symptom BEFORE CFS?  
Over the PAST 6 MONTHS, how OFTEN have you had this symptom?: Chest pain  
Over the PAST 6 MONTHS, how MUCH has this symptom bothered you?: Chest pain
17. Bloating: Did you have this symptom BEFORE CFS?  
Over the PAST 6 MONTHS, how OFTEN have you had this symptom?: Bloating  
Over the PAST 6 MONTHS, how MUCH has this symptom bothered you?: Bloating
18. Abdomen/stomach pain: Did you have this symptom BEFORE CFS?  
Over the PAST 6 MONTHS, how OFTEN have you had this symptom?: Abdomen/stomach pain  
Over the PAST 6 MONTHS, how MUCH has this symptom bothered you?: Abdomen/stomach pain
19. Headaches: Did you have this symptom BEFORE CFS?  
Over the PAST 6 MONTHS, how OFTEN have you had this symptom?: Headaches  
Over the PAST 6 MONTHS, how MUCH has this symptom bothered you?: Headaches
20. Muscle twitches: Did you have this symptom BEFORE CFS?  
Over the PAST 6 MONTHS, how OFTEN have you had this symptom?: Muscle twitches  
Over the PAST 6 MONTHS, how MUCH has this symptom bothered you?: Muscle twitches
21. Muscle weakness: Did you have this symptom BEFORE CFS?  
Over the PAST 6 MONTHS, how OFTEN have you had this symptom?: Muscle weakness  
Over the PAST 6 MONTHS, how MUCH has this symptom bothered you?: Muscle weakness
22. Sensitivity to noise: Did you have this symptom BEFORE CFS?  
Over the PAST 6 MONTHS, how OFTEN have you had this symptom?: Sensitivity to noise  
Over the PAST 6 MONTHS, how MUCH has this symptom bothered you?: Sensitivity to noise
23. Sensitivity to bright lights: Did you have this symptom BEFORE CFS?  
Over the PAST 6 MONTHS, how OFTEN have you had this symptom?: Sensitivity to bright lights  
Over the PAST 6 MONTHS, how MUCH has this symptom bothered you?: Sensitivity to bright lights
24. Problems remembering things: Did you have this symptom BEFORE CFS?  
Over the PAST 6 MONTHS, how OFTEN have you had this symptom?: Problems remembering things  
Over the PAST 6 MONTHS, how MUCH has this symptom bothered you?: Problems remembering things
25. Difficulty paying attention: Did you have this symptom BEFORE CFS?  
Over the PAST 6 MONTHS, how OFTEN have you had this symptom?: Difficulty paying attention  
Over the PAST 6 MONTHS, how MUCH has this symptom bothered you?: Difficulty paying attention
26. Difficulty finding the right word to say or expressing thoughts: Did you have this symptom BEFORE CFS?  
Over the PAST 6 MONTHS, how OFTEN have you had this symptom?: Difficulty finding the right word to say or expressing thoughts  
Over the PAST 6 MONTHS, how MUCH has this symptom bothered you?: Difficulty finding the right word to say or expressing thoughts
27. Difficulty understanding things: Did you have this symptom BEFORE CFS?  
Over the PAST 6 MONTHS, how OFTEN have you had this symptom?: Difficulty understanding things  
Over the PAST 6 MONTHS, how MUCH has this symptom bothered you?: Difficulty understanding things
28. Only can focus on one thing at a time: Did you have this symptom BEFORE CFS?

Over the PAST 6 MONTHS, how OFTEN have you had this symptom?: Only can focus on one thing at a time  
Over the PAST 6 MONTHS, how MUCH has this symptom bothered you?: Only can focus on one thing at a time

29. Unable to focus vision and attention: Did you have this symptom BEFORE CFS?  
Over the PAST 6 MONTHS, how OFTEN have you had this symptom?: Unable to focus vision and attention  
Over the PAST 6 MONTHS, how MUCH has this symptom bothered you?: Unable to focus vision and attention

30. Loss of depth perception: Did you have this symptom BEFORE CFS?  
Over the PAST 6 MONTHS, how OFTEN have you had this symptom?: Loss of depth perception  
Over the PAST 6 MONTHS, how MUCH has this symptom bothered you?: Loss of depth perception

31. Slowness of thought: Did you have this symptom BEFORE CFS?  
Over the PAST 6 MONTHS, how OFTEN have you had this symptom?: Slowness of thought  
Over the PAST 6 MONTHS, how MUCH has this symptom bothered you?: Slowness of thought

32. Absent-mindedness or forgetfulness: Did you have this symptom BEFORE CFS?  
Over the PAST 6 MONTHS, how OFTEN have you had this symptom?: Absent-mindedness or forgetfulness  
Over the PAST 6 MONTHS, how MUCH has this symptom bothered you?: Absent-mindedness or forgetfulness

33. Bladder problems: Did you have this symptom BEFORE CFS?  
Over the PAST 6 MONTHS, how OFTEN have you had this symptom?: Bladder problems  
Over the PAST 6 MONTHS, how MUCH has this symptom bothered you?: Bladder problems

34. Irritable bowel problems: Did you have this symptom BEFORE CFS?  
Over the PAST 6 MONTHS, how OFTEN have you had this symptom?: Irritable bowel problems  
Over the PAST 6 MONTHS, how MUCH has this symptom bothered you?: Irritable bowel problems

35. Nausea: Did you have this symptom BEFORE CFS?  
Over the PAST 6 MONTHS, how OFTEN have you had this symptom?: Nausea  
Over the PAST 6 MONTHS, how MUCH has this symptom bothered you?: Nausea

36. Feeling unsteady on your feet, like you might fall: Did you have this symptom BEFORE CFS?  
Over the PAST 6 MONTHS, how OFTEN have you had this symptom?: Feeling unsteady on your feet, like you might fall  
Over the PAST 6 MONTHS, how MUCH has this symptom bothered you?: Feeling unsteady on your feet, like you might fall

37. Shortness of breath or trouble catching your breath: Did you have this symptom BEFORE CFS?  
Over the PAST 6 MONTHS, how OFTEN have you had this symptom?: Shortness of breath or trouble catching your breath  
Over the PAST 6 MONTHS, how MUCH has this symptom bothered you?: Shortness of breath or trouble catching your breath

38. Dizziness or fainting: Did you have this symptom BEFORE CFS?  
Over the PAST 6 MONTHS, how OFTEN have you had this symptom?: Dizziness or fainting  
Over the PAST 6 MONTHS, how MUCH has this symptom bothered you?: Dizziness or fainting

39. Irregular heart beats: Did you have this symptom BEFORE CFS?  
Over the PAST 6 MONTHS, how OFTEN have you had this symptom?: Irregular heart beats  
Over the PAST 6 MONTHS, how MUCH has this symptom bothered you?: Irregular heart beats

40. Losing or gaining weight without trying: Did you have this symptom BEFORE CFS?  
Over the PAST 6 MONTHS, how OFTEN have you had this symptom?: Losing or gaining weight without trying  
Over the PAST 6 MONTHS, how MUCH has this symptom bothered you?: Losing or gaining weight without trying

41. No appetite: Did you have this symptom BEFORE CFS?  
Over the PAST 6 MONTHS, how OFTEN have you had this symptom?: No appetite  
Over the PAST 6 MONTHS, how MUCH has this symptom bothered you?: No appetite

42. Sweating hands: Did you have this symptom BEFORE CFS?  
Over the PAST 6 MONTHS, how OFTEN have you had this symptom?: Sweating hands  
Over the PAST 6 MONTHS, how MUCH has this symptom bothered you?: Sweating hands

43. Night sweats: Did you have this symptom BEFORE CFS?  
Over the PAST 6 MONTHS, how OFTEN have you had this symptom?: Night sweats  
Over the PAST 6 MONTHS, how MUCH has this symptom bothered you?: Night sweats

44. Cold limbs (e.g. arms, legs, hands): Did you have this symptom BEFORE CFS?  
Over the PAST 6 MONTHS, how OFTEN have you had this symptom?: Cold limbs (e.g. arms, legs, hands)  
Over the PAST 6 MONTHS, how MUCH has this symptom bothered you?: Cold limbs (e.g. arms, legs, hands)

45. Feeling chills or shivers: Did you have this symptom BEFORE CFS?  
Over the PAST 6 MONTHS, how OFTEN have you had this symptom?: Feeling chills or shivers  
Over the PAST 6 MONTHS, how MUCH has this symptom bothered you?: Feeling chills or shivers

46. Feeling hot or cold for no reason: Did you have this symptom BEFORE CFS?  
Over the PAST 6 MONTHS, how OFTEN have you had this symptom?: Feeling hot or cold for no reason  
Over the PAST 6 MONTHS, how MUCH has this symptom bothered you?: Feeling hot or cold for no reason

47. Feeling like you have a high temperature: Did you have this symptom BEFORE CFS?  
Over the PAST 6 MONTHS, how OFTEN have you had this symptom?: Feeling like you have a high temperature  
Over the PAST 6 MONTHS, how MUCH has this symptom bothered you?: Feeling like you have a high temperature

48. Feeling like you have a low temperature: Did you have this symptom BEFORE CFS?  
Over the PAST 6 MONTHS, how OFTEN have you had this symptom?: Feeling like you have a low temperature  
Over the PAST 6 MONTHS, how MUCH has this symptom bothered you?: Feeling like you have a low temperature

49. Alcohol intolerance: Did you have this symptom BEFORE CFS?  
Over the PAST 6 MONTHS, how OFTEN have you had this symptom?: Alcohol intolerance  
Over the PAST 6 MONTHS, how MUCH has this symptom bothered you?: Alcohol intolerance

50. Sore throat: Did you have this symptom BEFORE CFS?  
Over the PAST 6 MONTHS, how OFTEN have you had this symptom?: Sore throat  
Over the PAST 6 MONTHS, how MUCH has this symptom bothered you?: Sore throat

51. Tender/sore lymph nodes: Did you have this symptom BEFORE CFS?  
Over the PAST 6 MONTHS, how OFTEN have you had this symptom?: Tender/sore lymph nodes  
Over the PAST 6 MONTHS, how MUCH has this symptom bothered you?: Tender/sore lymph nodes

52. Fever: Did you have this symptom BEFORE CFS?  
Over the PAST 6 MONTHS, how OFTEN have you had this symptom?: Fever  
Over the PAST 6 MONTHS, how MUCH has this symptom bothered you?: Fever

53. Flu-like symptoms: Did you have this symptom BEFORE CFS?  
Over the PAST 6 MONTHS, how OFTEN have you had this symptom?: Flu-like symptoms  
Over the PAST 6 MONTHS, how MUCH has this symptom bothered you?: Flu-like symptoms

54. Some smells, foods, medications, or chemicals make you feel sick: Did you have this symptom BEFORE CFS?  
Over the PAST 6 MONTHS, how OFTEN have you had this symptom?: Some smells, foods, medications, or chemicals make you feel sick  
Over the PAST 6 MONTHS, how MUCH has this symptom bothered you?: Some smells, foods, medications, or chemicals make you feel sick



PSQI

1. During the past month, what time have you usually gone to bed at night?
2. During the past month, how long (in minutes) has it usually taken you to fall asleep each night?
3. During the past month, what time have you usually gotten up in the morning?
4. During the past month, how many hours of actual sleep did you get at night? (This may be different than the number of hours you spent in bed.)
- 5a) Cannot get to sleep within 30 minutes
- 5b) Wake up in the middle of the night or early morning
- 5c) Have to get up to use the bathroom
- 5d) Cannot breathe comfortably
- 5e) Cough or snore loudly
- 5f) Feel too cold
- 5g) Feel too hot
- 5h) Had bad dreams
- 5i) Have pain
- 5j) Other Reasons
- 5j) Other Reasons (Please specify)
6. During the past month, how would you rate your sleep quality overall?
7. During the past month, how often have you taken medicine to help you sleep (prescribed or over the counter)?
8. During the past month, how often have you had trouble staying awake while driving, eating meals, or engaging in social activity?
9. During the past month, how much of a problem has it been for you to keep up enough enthusiasm to get things done?
10. Do you have a bed partner or room mate?
- 10a) Loud snoring
- 10b) Long pauses between breaths while asleep
- 10c) Legs twitching or jerking while you sleep
- 10d) Episodes of disorientation or confusion during sleep
- 10e) Other restlessness while you sleep
- 10e) Other restlessness while you sleep; please describe

SF-36

1. In general, would you say your health is:
2. Compared to one year ago, how would your rate your health in general now?
3. Vigorous activities, such as running, lifting heavy objects, participating in strenuous sports
4. Moderate activities, such as moving a table, pushing a vacuum cleaner, bowling, or playing golf
5. Lifting or carrying groceries
6. Climbing several flights of stairs
7. Climbing one flight of stairs
8. Bending, kneeling, or stooping
9. Walking more than a mile
10. Walking several blocks
11. Walking one block
12. Bathing or dressing yourself
13. Cut down the amount of time you spent on work or other activities
14. Accomplished less than you would like
15. Were limited in the kind of work or other activities
16. Had difficulty performing the work or other activities (for example, it took extra effort)
17. Cut down the amount of time you spent on work or other activities
18. Accomplished less than you would like
19. Didn't do work or other activities as carefully as usual
20. During the past 4 weeks, to what extent has your physical health or emotional problems interfered with your normal social activities with family, friends, neighbors, or groups? (Choose one answer.)
21. How much bodily pain have you had during the past 4 weeks? (Choose one answer.)
22. During the past 4 weeks, how much did pain interfere with your normal work (including both work outside the home and housework)? (Choose one answer.)
23. Did you feel full of pep?
24. Have you been a very nervous person?
25. Have you felt so down in the dumps that nothing could cheer you up?
26. Have you felt calm and peaceful?
27. Did you have a lot of energy?
28. Have you felt downhearted and blue?
29. Did you feel worn out?
30. Have you been a happy person?
31. Did you feel tired?
32. During the past 4 weeks, how much of the time has your physical health or emotional problems interfered with your social activities (like visiting with friends, relatives, etc.)?(Choose one number)
33. I seem to get sick a little easier than other people
34. I am as healthy as anybody I know
35. I expect my health to get worse
36. My health is excellent

MFI

1. I feel fit.
2. Physically I feel only able to do a little.
3. I feel very active.
4. I feel like doing all sorts of nice things.
5. I feel tired.
6. I think I do a lot in a day.
7. When I am doing something, I can keep my thoughts on it.
8. Physically I can take on a lot.
9. I dread having to do things.
10. I think I do very little in a day.
11. I can concentrate well.
12. I am rested.
13. It takes a lot of effort to concentrate on things.
14. Physically I feel I am in a bad condition.
15. I have a lot of plans.
16. I tire easily.
17. I get little done.
18. I don't feel like doing anything.
19. My thoughts easily wander.
20. Physically I feel I am in an excellent condition.

Table S7.

| Compound name                | A. ME/CFS vs. Control |              |              |         |              |              |
|------------------------------|-----------------------|--------------|--------------|---------|--------------|--------------|
|                              | Case                  |              |              | Control |              |              |
|                              | Median                | 25% quantile | 75% quantile | Median  | 25% quantile | 75% quantile |
| LPC 18:2                     | 179492                | 155385       | 223064       | 248296  | 190397       | 351462       |
| Betaine                      | 1279930               | 1023228      | 1536118      | 1392119 | 1251990      | 1691588      |
| TG 53:5                      | 4928                  | 3348         | 7020         | 3143    | 2126         | 4476         |
| α N-phenylacetyl-L-glutamine | 53165                 | 30910        | 67632        | 30331   | 20633        | 48028        |
| PC 30:0                      | 76948                 | 49105        | 130279       | 100156  | 74461        | 142271       |
| SM d32:1                     | 4753                  | 3125         | 5747         | 5116    | 4056         | 5798         |
| PC 33:0                      | 5201                  | 1213         | 7745         | 7183    | 5180         | 8368         |
| Urobilin                     | 4201                  | 2687         | 9489         | 2861    | 1561         | 5375         |
| ε Caprolactam                | 205675                | 181596       | 230038       | 199070  | 141933       | 210973       |
| TG 54:8                      | 1581                  | 1012         | 3701         | 848     | 493          | 1417         |
| γ Butyrobetaine              | 4493                  | 1053         | 5513         | 5275    | 4342         | 6135         |
| PC p34:2 or PC o34:3         | 54564                 | 35879        | 67516        | 61816   | 54040        | 79247        |
| TG 53:4                      | 20915                 | 15425        | 27333        | 14982   | 11319        | 21826        |
| L-carnitine                  | 174682                | 147927       | 198693       | 193258  | 168161       | 216571       |
| TG 52:5                      | 108366                | 70198        | 146070       | 68231   | 49268        | 103964       |
| PC 28:0                      | 1062                  | 265          | 2493         | 1664    | 836          | 4030         |
| PC 34:0                      | 22338                 | 19897        | 23905        | 24394   | 21452        | 26470        |
| TG 54:6 A                    | 97935                 | 52860        | 218527       | 67738   | 39669        | 100803       |
| PC 36:4 A                    | 177344                | 121466       | 226481       | 206163  | 152152       | 273571       |
| Indole-3-lactate             | 430                   | 364          | 480          | 487     | 411          | 541          |
| Tyr Met Lys                  | 3453042               | 3032911      | 3810594      | 3134672 | 2783992      | 3512217      |
| TG 52:4                      | 1026752               | 772065       | 1361031      | 750095  | 550290       | 1067028      |
| TG 52:3                      | 2739390               | 2376790      | 3161104      | 2309462 | 1825497      | 2789254      |
| PC 34:4                      | 8274                  | 4914         | 11888        | 9866    | 7878         | 12762        |
| LPC 16:1                     | 8670                  | 6308         | 11088        | 10940   | 7778         | 12673        |
| Acylearnitine C9:1           | 3415                  | 2638         | 4792         | 4010    | 2985         | 6353         |
| PC 32:2                      | 23469                 | 19039        | 32235        | 30006   | 24087        | 37648        |
| PC 32:0                      | 114673                | 103817       | 130796       | 130088  | 115597       | 152724       |
| PC p36:4 or PC o36:5         | 107071                | 83057        | 122311       | 112599  | 97049        | 144855       |
| CE 18:3                      | 2812                  | 1281         | 3668         | 3253    | 2780         | 3956         |
| PC 35:4                      | 7225                  | 5142         | 9828         | 9124    | 6901         | 11146        |
| PC 34:1                      | 2719857               | 2346822      | 3116607      | 3044490 | 2627182      | 3427536      |
| TG 54:5 A                    | 650126                | 433320       | 1139461      | 525607  | 351734       | 652639       |
| DG 36:3                      | 8317                  | 5461         | 10930        | 6604    | 4630         | 8458         |
| Acylearnitine C11:1          | 5196                  | 3074         | 8403         | 7477    | 4555         | 9700         |
| PE p36:4 or PE o36:5         | 18904                 | 14532        | 24565        | 22069   | 16799        | 27636        |

| Compound name          | B. ME/CFS + IBS vs. Control |              |              |         |              |              |
|------------------------|-----------------------------|--------------|--------------|---------|--------------|--------------|
|                        | Case w/ IBS                 |              |              | Control |              |              |
|                        | Median                      | 25% quantile | 75% quantile | Median  | 25% quantile | 75% quantile |
| LPC 18:2               | 172041                      | 156986       | 193553       | 248296  | 190397       | 351462       |
| Ceramide d36:1         | 6548                        | 4225         | 8952         | 4925    | 3580         | 6077         |
| γ Butyrobetaine        | 4493                        | 1053         | 5513         | 5275    | 4342         | 6135         |
| LPC 18:1               | 90932                       | 82643        | 102614       | 121750  | 97896        | 173305       |
| 5-Methylthioadenosine  | 6761                        | 5969         | 7562         | 5715    | 4937         | 6416         |
| TG 49:2                | 23334                       | 16527        | 39487        | 15809   | 10103        | 22368        |
| Ceramide d40:0         | 10870                       | 8716         | 11885        | 8137    | 6362         | 9878         |
| TG 51:3                | 38843                       | 32042        | 41581        | 27662   | 19003        | 35863        |
| Betaine                | 1336374                     | 970931       | 1496378      | 1392119 | 1251990      | 1691588      |
| Ceramide d42:0         | 14066                       | 8203         | 16400        | 9779    | 7643         | 12714        |
| LPC p16:0 or LPC o16:1 | 3355                        | 990          | 4478         | 4833    | 3583         | 5928         |
| Ceramide d34:1         | 25249                       | 18929        | 28429        | 21411   | 17553        | 24474        |
| Indole-3-lactate       | 428                         | 377          | 489          | 487     | 411          | 541          |
| TG 50:3                | 374616                      | 323258       | 483891       | 249998  | 175958       | 356389       |
| TG 53:4                | 19253                       | 16676        | 25733        | 14982   | 11319        | 21826        |
| PE 38:6                | 56259                       | 40084        | 72862        | 48664   | 38015        | 57611        |
| TG 53:3                | 35998                       | 28634        | 41843        | 29991   | 21995        | 36646        |
| TG 51:4                | 8221                        | 6596         | 11434        | 6073    | 4004         | 9118         |
| TG 52:5                | 86571                       | 69664        | 141503       | 68231   | 49268        | 103964       |
| PC 36:4 A              | 159439                      | 145519       | 215864       | 206163  | 152152       | 273571       |
| TG 53:5                | 4375                        | 3263         | 6087         | 3143    | 2126         | 4476         |
| TG 51:2                | 58147                       | 48054        | 73795        | 39693   | 27452        | 55735        |
| TG 50:4                | 60581                       | 38976        | 75780        | 36599   | 26522        | 56887        |
| DG 34:1                | 2587                        | 2219         | 3704         | 2067    | 1525         | 2890         |
| Mannitol               | 2137                        | 1577         | 3302         | 1735    | 1285         | 2034         |
| PC 34:2                | 5470005                     | 4849585      | 5905124      | 6014348 | 5273487      | 6848672      |
| Ceramide d38:1         | 11234                       | 8132         | 13010        | 8284    | 6251         | 9709         |
| PC p32:0 or PC o32:1   | 11889                       | 9966         | 14683        | 14718   | 10776        | 16925        |
| PC p34:2 or PC o34:3   | 52116                       | 35656        | 67870        | 61816   | 54040        | 79247        |
| TG 51:1                | 8455                        | 5491         | 20366        | 7723    | 3940         | 12688        |
| TG 53:2                | 31992                       | 23086        | 36417        | 25954   | 17009        | 31664        |
| CE 18:1                | 20938                       | 16688        | 26593        | 24321   | 19645        | 31587        |
| PE 34:2                | 5258                        | 4001         | 8043         | 3894    | 2669         | 6624         |
| TG 52:4                | 818575                      | 695793       | 1150735      | 750095  | 550290       | 1067028      |
| L-alanine              | 65040                       | 59436        | 74211        | 58825   | 45620        | 70459        |
| L-carnitine            | 173333                      | 158294       | 207513       | 193258  | 168161       | 216571       |
| PE 38:4 B              | 48044                       | 30210        | 53163        | 31741   | 25744        | 43455        |
| TG 50:2                | 1102315                     | 836462       | 1512512      | 908734  | 628674       | 1128742      |
| PC 40:8                | 5842                        | 4734         | 6814         | 6735    | 5517         | 7628         |
| PE 36:4                | 17608                       | 13963        | 29023        | 15550   | 10280        | 20660        |
| Cholesterol            | 101990                      | 85562        | 109649       | 109680  | 96311        | 130804       |
| Ceramide d40:1         | 8156                        | 6617         | 10783        | 6862    | 5353         | 10019        |
| PE 36:2                | 13771                       | 8986         | 16397        | 9752    | 7293         | 15240        |
| TG 48:2                | 170124                      | 109896       | 307751       | 109954  | 52831        | 193975       |

**C. ME/CFS w/o IBS vs. Control**

| Compound name        | Case w/o IBS |              |              | Control |              |              |
|----------------------|--------------|--------------|--------------|---------|--------------|--------------|
|                      | Median       | 25% quantile | 75% quantile | Median  | 25% quantile | 75% quantile |
| PC 33.0              | 3459         | 1055         | 5377         | 7183    | 5180         | 8368         |
| PC 38.2              | 14995        | 12213        | 18071        | 17576   | 16323        | 19522        |
| PC 30.0              | 69291        | 48294        | 93266        | 100156  | 74461        | 142271       |
| tyrosine             | 20347        | 16466        | 23740        | 24568   | 20595        | 27234        |
| PC 36.6              | 1893         | 629          | 4905         | 4060    | 3067         | 5772         |
| TG 54:6 A            | 157556       | 85372        | 219191       | 67738   | 39669        | 100803       |
| TG 53:5              | 5522         | 4101         | 7226         | 3143    | 2126         | 4476         |
| TG 54:8              | 1955         | 1310         | 3945         | 848     | 493          | 1417         |
| Tyr Met Lys          | 3500360      | 3216387      | 3642125      | 3134672 | 2783992      | 3512217      |
| PC 32:2              | 22562        | 17031        | 28309        | 30006   | 24087        | 37648        |
| PC 32:1              | 225118       | 171000       | 301427       | 297216  | 230582       | 433990       |
| LPC 18:2             | 186390       | 151560       | 260684       | 248296  | 190397       | 351462       |
| LPC 16:1             | 8485         | 5952         | 10386        | 10940   | 7778         | 12673        |
| PC 32:1              | 7967         | 4121         | 13060        | 10048   | 7485         | 16660        |
| SM d32:1             | 50537        | 38044        | 57484        | 56125   | 49836        | 68890        |
| PC 28.0              | 537          | 178          | 1376         | 1664    | 836          | 4030         |
| PC 34.4              | 6870         | 4699         | 9610         | 9866    | 7878         | 12762        |
| Linoleic acid        | 1199         | 478          | 1567         | 647     | 419          | 1016         |
| SM d32:2             | 4464         | 1606         | 5317         | 5116    | 4056         | 5798         |
| PC 32.0              | 111191       | 102205       | 130538       | 130088  | 115597       | 152724       |
| Acylcarnitine C9:1   | 3028         | 2609         | 4304         | 4010    | 2985         | 6353         |
| TG 52:3              | 3005708      | 2489795      | 3400668      | 2309462 | 1825497      | 2789254      |
| PC p34:2 or PC o34:3 | 57332        | 36185        | 67042        | 61816   | 54040        | 79247        |
| Indole-3-lactate     | 431          | 343          | 476          | 487     | 411          | 541          |
| PC 34.0              | 22279        | 19470        | 25076        | 24394   | 21452        | 26470        |
| TG 54:4              | 1054750      | 819345       | 1483814      | 768365  | 550304       | 987215       |
| TG 52:4              | 1116980      | 972290       | 1548461      | 750095  | 550290       | 1067028      |
| TG 52:5              | 124159       | 76153        | 164000       | 68231   | 49268        | 103964       |
| PC p36:4 or PC o36:5 | 93960        | 77738        | 116035       | 112599  | 97049        | 144855       |
| DG 36:3              | 9336         | 5626         | 12295        | 6604    | 4630         | 8458         |
| TG 14:0:14:0:14:0    | 2119         | 1454         | 4661         | 3215    | 2017         | 7794         |
| PC 34.4              | 6870         | 4699         | 9610         | 9866    | 7878         | 12762        |
| Urobilin             | 3873         | 3027         | 8379         | 2861    | 1561         | 5375         |
| L-carnitine          | 176031       | 147802       | 191233       | 193258  | 168161       | 216571       |
| PC 32:2              | 22562        | 17031        | 28309        | 30006   | 24087        | 37648        |
| PC 32.0              | 111191       | 102205       | 130538       | 130088  | 115597       | 152724       |
| PC 33:1              | 22967        | 16562        | 26167        | 28753   | 21858        | 33140        |
| Betaine              | 1247715      | 1066878      | 1635242      | 1392119 | 1251990      | 1691588      |
| PC 40:6 A            | 6474         | 4579         | 7777         | 7443    | 6483         | 9212         |
| PC 37:3              | 5547         | 3677         | 6969         | 7326    | 5747         | 9323         |
| Ceramide d43:1       | 4772         | 3155         | 8600         | 8535    | 5390         | 14003        |
| Ceramide d42:1       | 21521        | 17220        | 27353        | 23923   | 20672        | 28491        |
| PE p36:4 or PE o36:5 | 16869        | 12271        | 20816        | 22069   | 16799        | 27636        |
| PC 36:4 A            | 184909       | 121143       | 228838       | 206163  | 152152       | 273571       |
| PC 30:1              | 1162         | 633          | 1671         | 2037    | 1153         | 2837         |
| PC 35:4              | 6824         | 5123         | 9664         | 9124    | 6901         | 11146        |
| LPC 14:0             | 4905         | 3962         | 6663         | 6502    | 5333         | 8176         |
| Acylcarnitine C11:1  | 5162         | 3005         | 7591         | 7477    | 4555         | 9700         |
| PC 34:1              | 2627415      | 2293265      | 2881503      | 3044490 | 2627182      | 3427536      |
| TG 53:4              | 22899        | 14951        | 29841        | 14982   | 11319        | 21826        |
| CE 18:3              | 2799         | 1271         | 3186         | 3253    | 2780         | 3956         |
| PC 38:2              | 14995        | 12213        | 18071        | 17576   | 16323        | 19522        |

**D. ME/CFS vs. Control -female only**

| Compound name          | Case    |              |              | Control |              |              |
|------------------------|---------|--------------|--------------|---------|--------------|--------------|
|                        | Median  | 25% quantile | 75% quantile | Median  | 25% quantile | 75% quantile |
| LPC 18:2               | 172820  | 148255       | 202626       | 240225  | 192702       | 322829       |
| TG 53:5                | 4827    | 3604         | 6649         | 3086    | 2070         | 4073         |
| TG 51:3                | 38843   | 26467        | 42954        | 26241   | 17324        | 32509        |
| indole-3-lactate       | 414     | 354          | 468          | 496     | 415          | 541          |
| LPC 18:2               | 34044   | 29468        | 50476        | 47279   | 40224        | 58203        |
| TG 52:3                | 2726968 | 2386933      | 3101689      | 2215517 | 1748615      | 2585879      |
| PC 30:0                | 76223   | 51538        | 119021       | 101328  | 78713        | 142772       |
| γ-butyrobetaine        | 4161    | 1008         | 4934         | 5246    | 3839         | 6000         |
| PC 28.0                | 838     | 222          | 2463.75      | 1664    | 836          | 4030         |
| PC 33.0                | 5253    | 1571         | 7866         | 7356    | 5435         | 8595         |
| LPC 20:2               | 1161.5  | 717          | 1373.75      | 1673    | 1170.5       | 2258.5       |
| TG 52:5                | 106139  | 71800        | 144185       | 63321   | 47856        | 87770        |
| LPC 18:1               | 90790   | 77781        | 106761       | 121099  | 97600        | 170828       |
| TG 52:4                | 1041107 | 802408       | 1339656      | 691854  | 547075       | 989282       |
| LPE 18:2               | 2317    | 443          | 4406         | 4528    | 646          | 6526         |
| L-carnitine            | 166322  | 140578       | 188782       | 192733  | 167381       | 211060       |
| TG 53:3                | 37010   | 27672        | 44800        | 27965   | 21952        | 32993        |
| CE 18:3                | 2805    | 1201.5       | 3702         | 3317    | 2831         | 3969         |
| SM d32:1               | 51650   | 43801        | 67176        | 57182   | 50917        | 69434        |
| PC 32.0                | 115152  | 105669       | 130615       | 132739  | 120687       | 155446       |
| PC 34.0                | 22498   | 20035        | 24060        | 25367   | 21762        | 27109        |
| TG 51:4                | 8258    | 6596         | 13168        | 5719    | 3758         | 8261         |
| PC 40:8                | 6060    | 4787         | 6814         | 6797    | 5838         | 7681         |
| TG 53:4                | 19477   | 15703        | 27294        | 13891   | 9657         | 18879        |
| TG 54:5 A              | 634811  | 445412       | 1138307      | 485318  | 345512       | 649238       |
| leucine                | 34134   | 29909        | 39505        | 37018   | 31813        | 45228        |
| PC p-36:4 or PC o-36:5 | 108159  | 82672        | 125831       | 113840  | 97776        | 147665       |
| DG 36:3                | 8490    | 5470         | 10623        | 6425    | 4570         | 8095         |
| TG 54:6 A              | 87674   | 54708        | 197908       | 63453   | 37117        | 98049        |
| LPC 16:1               | 8378    | 6455         | 10943        | 11069   | 7795         | 12737        |
| PC p-34:2 or PC o-34:3 | 56321   | 36185        | 67053        | 63667   | 54736        | 83434        |
| PC 35:4                | 7411    | 5700         | 9846         | 9571    | 6926         | 11525        |
| PC 34:1                | 2689627 | 2338224      | 3129772      | 3095847 | 2654918      | 3424823      |
| PC p-34:2 or PC o-34:3 | 8394    | 7171         | 10719        | 11966   | 8132         | 13633        |
| LPC 16:0               | 670902  | 598646       | 798955       | 826534  | 625583       | 930460       |
| Acylcarnitine C9:1     | 3438.5  | 2668         | 4528         | 4279    | 2968         | 6354         |
| LPC 18:1               | 24750   | 20596        | 33925        | 32757   | 24877        | 46558        |
| PC p-36:4 or PC o-36:5 | 8025    | 5725         | 10892        | 9997    | 7372         | 12330        |
| PE p-36:4 or PE o-36:5 | 19005   | 15183        | 26547        | 24180   | 17264        | 28425        |
